# Supplementary material for: Overexpression of UGT74E2, an Arabidopsis IBA Glycosyltransferase, Enhances Seed Germination and Modulates Stress Tolerance via ABA Signaling in Rice
Source: PubMed Central journal article supplement (PMC7582762; doi:10.3390/ijms21197239), 2020-09-30
Supplement: ijms-21-07239-s001.pdf [file ijms-21-07239-s001.pdf]

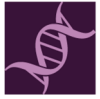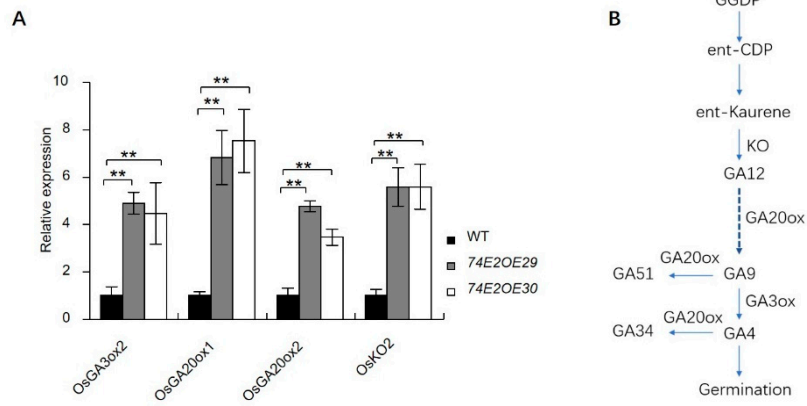

**Figure S1.** Expression of GA biosynthesis pathway genes in germinating seeds imbibed for 36 h (A). The gene expression was normalized to the reference gene *OsActin*. For each experiments, three replicates were done and data are means  $\pm$  SD. Student's t test for each line was performed (\*  $p < 0.05$ , \*\*  $p < 0.01$ ). (B) Roles of GA biosynthesis genes in the GA biosynthesis pathway.

**Table S1.** Sequences of primers used in this study.

| Gene                             | Forward (5'–3')             | Reverse (5'–3')              |
|----------------------------------|-----------------------------|------------------------------|
| <b>Primers for Gene Cloning</b>  |                             |                              |
| <i>UGT74E2</i>                   | CGCCATATGAGAGAAGGATCTCATCTT | CCGCTCGAGACAAAACATAGAAACAAAC |
| <b>Primers for qPCR Analysis</b> |                             |                              |
| <i>OsActin</i>                   | GACCTTGCTGGGCGTGAT          | GTCATAGTCCAGGGCGATGT         |
| <i>UGT74E2</i>                   | ACTCTGGTCCTCGTCTCC          | ATGGTTCCTCGCCTTC             |
| <i>OsABI3</i>                    | TGACGATACCTTCCCGTTGC        | CGAGGAGCTGGTCTATGTCC         |
| <i>OsABI5</i>                    | AGCGGTGAACCAGTTTGATT        | ATCTGCCTGTTTCTCTCCA          |
| <i>OsIAA1</i>                    | ATAGGTACCGAGCCGAAGCATCA     | ATAGGATCCAACCACCGGTCATG      |
| <i>OsARF1</i>                    | AGCCATCAGAATTACACCGC        | ATGAACTAGCCAGTAGCCAC         |
| <i>OsARF4</i>                    | AGACCGCATGCATCAATAGC        | TCTGATTTGTTGGGCATCGG         |
| <i>OsARF5</i>                    | CAGCAACTCCACTAATGACC        | TCACCATCCAAGCTCATCTG         |
| <i>OsARF7</i>                    | ACTACAGCGAACACAGGAAC        | TATGGCCAGGTAGCATTGAG         |
| <i>OsARF8</i>                    | ATCATGTCCGTCCAACATCC        | GTCGGTTAGTATGGTAAGCC         |
| <i>OsGH3-1</i>                   | CGGGAACAAGCAATGGAACA        | CAGATCATCACCTCTAGCTTCAA      |
| <i>OsGH3-2</i>                   | TCATGCCCGTCATGAACTTG        | TCGTCTCCGACTTGATGAACAG       |
| <i>OsGH3-5</i>                   | GGTCGGCAAAATCTATGAAG        | TGGAGGTCTTTCTCGGTGTT         |
| <i>OsGH3-10</i>                  | AGCAGTCTCGCTACATCTGTCTTG    | CGCTTTTGTATACGCTCGTCAA       |
| <i>OsGH3-13</i>                  | TGTGTAATGTCAAACGTTGCTCAT    | TGATTCATAAAGAACACTGCTCGTATT  |
| <i>OsDREB1A</i>                  | ATGGGCTGGGACCTGTACTA        | GCATCGGAAGCCAGAAAAGAG        |
| <i>OsMYB4</i>                    | CGGTGGATCAACTACCTCCG        | CGTCCAGCCTCTTCTTGAGG         |
| <i>OsAPxO2</i>                   | TTCAGCTTTCGTTTGTGCGG        | ACCACTCGCAATCCAACGAT         |
| <i>OsCAT-A</i>                   | TTGGGGGTGAAGATTGCGAA        | CGACAACAGAAGATGCGTGC         |
| <i>OsCAT-B</i>                   | GCTTGCACAGTTTGACAGGG        | CGACTGTGGAGAACCGAACA         |
| <i>OsSODB</i>                    | ACAACGGCAACCCATTACCA        | CAGCCAGACCCCAAAAGTGA         |
| <i>OsHKT1</i>                    | GCAGCTGGAAGCAGCAATTC        | AAACGAGGAGACTGTGACCG         |
| <i>OsDREB1F</i>                  | TGTTTCGACCATGGACACCGA       | ACATGTCAGTCCATCCATAGCTT      |
| <i>OsDREB2A</i>                  | ATGTATGGTCCCACAGCACG        | ACAACACAGCTGGCCCATTA         |
| <i>OsCOIN</i>                    | TCAAAGCAGCAAATGCACCC        | CATGGCCATCAATGAAGCGG         |
| <i>OsKO2</i>                     | TGCTACCAGCGACTATTGTGATTT    | GTGCAGAAGTACCCAACATGCTT      |
| <i>OsGA20ox2</i>                 | CCAATTTTGGACCCTACCGC        | GAGAGAAGCCCAACCCAACC         |
| <i>OsGA20ox1</i>                 | GCCACTACAGGGCCGACAT         | TGGTTGCAGGTGACGATGAT         |
| <i>OsGA3ox2</i>                  | TCCTCCTTCTTCTCCAAGCTCAT     | GAAACTCCTCCATCACGTCACA       |
